# Supplementary material for: Luteibacter flocculans sp. nov., Isolated from a Eutrophic Pond and Isolation and Characterization of Luteibacter Phage vB_LflM-Pluto
Source: Microorganisms. 2023 Jan 24;11(2):307. doi: 10.3390/microorganisms11020307 (PMC9965599; doi:10.3390/microorganisms11020307)
Supplement: Supplementary file 1 [file microorganisms-11-00307-s001.zip]

Archive with 6 entries (6 files):
- Data File_S1.tsv
- __MACOSX/._Data File_S1.tsv
- Figures_S1-S2.pdf
- __MACOSX/._Figures_S1-S2.pdf
- Tables_S1-S7.xlsx
- __MACOSX/._Tables_S1-S7.xlsx
