# Supplementary material for: Luteibacter flocculans sp. nov., Isolated from a Eutrophic Pond and Isolation and Characterization of Luteibacter Phage vB_LflM-Pluto
Source: Microorganisms. 2023 Jan 24;11(2):307. doi: 10.3390/microorganisms11020307 (PMC9965599; doi:10.3390/microorganisms11020307)
Supplement: Supplementary file 1 [file microorganisms-11-00307-s001.zip › Data File_S1.tsv]

user_genome	classification	fastani_reference	fastani_reference_radius	fastani_taxonomy	fastani_ani	fastani_af	closest_placement_reference	closest_placement_radius	closest_placement_taxonomy	closest_placement_ani	closest_placement_af	pplacer_taxonomy	classification_method	note	other_related_references(genome_id,species_name,radius,ANI,AF)	aa_percent	translation_table	red_value	warnings
EIF3	d__Bacteria;p__Proteobacteria;c__Gammaproteobacteria;o__Xanthomonadales;f__Rhodanobacteraceae;g__Luteibacter;s__Luteibacter sp900119235	GCF_900119235.1	95.0	d__Bacteria;p__Proteobacteria;c__Gammaproteobacteria;o__Xanthomonadales;f__Rhodanobacteraceae;g__Luteibacter;s__Luteibacter sp900119235	96.48	0.94	GCF_900119235.1	95.0	d__Bacteria;p__Proteobacteria;c__Gammaproteobacteria;o__Xanthomonadales;f__Rhodanobacteraceae;g__Luteibacter;s__Luteibacter sp900119235	96.48	0.94	d__Bacteria;p__Proteobacteria;c__Gammaproteobacteria;o__Xanthomonadales;f__Rhodanobacteraceae;g__Luteibacter;s__	taxonomic classification defined by topology and ANI	topological placement and ANI have congruent species assignments	GCF_900110505.1, s__Luteibacter sp900110505, 95.0, 83.3, 0.65; GCF_900109915.1, s__Luteibacter sp900109915, 95.0, 83.01, 0.65; GCF_000745055.1, s__Luteibacter sp000745055, 95.0, 82.02, 0.6; GCF_000745005.1, s__Luteibacter sp000745005, 95.0, 81.96, 0.59; GCF_006385595.1, s__Luteibacter pinisoli, 95.0, 81.96, 0.61; GCF_001887595.1, s__Luteibacter rhizovicinus, 95.0, 81.89, 0.62; GCF_000964085.1, s_…	97.6	11	N/A	N/A
