# Supplementary material for: Luteibacter flocculans sp. nov., Isolated from a Eutrophic Pond and Isolation and Characterization of Luteibacter Phage vB_LflM-Pluto
Source: Microorganisms. 2023 Jan 24;11(2):307. doi: 10.3390/microorganisms11020307 (PMC9965599; doi:10.3390/microorganisms11020307)
Supplement: Supplementary file 1 [file microorganisms-11-00307-s001.zip › Tables_S1-S7.xlsx]

## Sheet: S1 Table
S1 Table: KEGG Mapper Reconstruction Result of Luteibacter flocculans EIF3T chromosome.
	Pathway modules
	Carbohydrate metabolism
	Central carbohydrate metabolism
	M00001 Glycolysis (Embden-Meyerhof pathway), glucose => pyruvate (10) (complete 9/9)
	M00002 Glycolysis, core module involving three-carbon compounds (6) (complete 5/5)
	M00003 Gluconeogenesis, oxaloacetate => fructose-6P (8) (complete 7/7)
	M00307 Pyruvate oxidation, pyruvate => acetyl-CoA (3) (complete 1/1)
	M00009 Citrate cycle (TCA cycle, Krebs cycle) (18) (complete 8/8)
	M00010 Citrate cycle, first carbon oxidation, oxaloacetate => 2-oxoglutarate (4) (complete 3/3)
	M00011 Citrate cycle, second carbon oxidation, 2-oxoglutarate => oxaloacetate (14) (complete 5/5)
	M00004 Pentose phosphate pathway (Pentose phosphate cycle) (8) (complete 7/7)
	M00006 Pentose phosphate pathway, oxidative phase, glucose 6P => ribulose 5P (3) (complete 2/2)
	M00007 Pentose phosphate pathway, non-oxidative phase, fructose 6P => ribose 5P (4) (complete 4/4)
	M00005 PRPP biosynthesis, ribose 5P => PRPP (1) (complete 1/1)
	M00008 Entner-Doudoroff pathway, glucose-6P => glyceraldehyde-3P + pyruvate (4) (complete 4/4)
	Other carbohydrate metabolism
	M00552 D-galactonate degradation, De Ley-Doudoroff pathway, D-galactonate => glycerate-3P (5) (complete 5/5)
	M00549 Nucleotide sugar biosynthesis, glucose => UDP-glucose (4) (complete 3/3)
	M00909 UDP-N-acetyl-D-glucosamine biosynthesis, prokaryotes, glucose => UDP-GlcNAc (5) (complete 5/5)
	M00012 Glyoxylate cycle (5) (complete 5/5)
	Energy metabolism
	Carbon fixation
	M00168 CAM (Crassulacean acid metabolism), dark (2) (complete 2/2)
	M00579 Phosphate acetyltransferase-acetate kinase pathway, acetyl-CoA => acetate (2) (complete 2/2)
	ATP synthesis
	M00144 NADH:quinone oxidoreductase, prokaryotes (14) (complete 1/1)
	M00149 Succinate dehydrogenase, prokaryotes (4) (complete 1/1)
	M00151 Cytochrome bc1 complex respiratory unit (3) (complete 1/1)
	M00155 Cytochrome c oxidase, prokaryotes (3) (complete 1/1)
	M00417 Cytochrome o ubiquinol oxidase (4) (complete 1/1)
	M00157 F-type ATPase, prokaryotes and chloroplasts (8) (complete 1/1)
	Lipid metabolism
	Fatty acid metabolism
	M00082 Fatty acid biosynthesis, initiation (6) (complete 2/2)
	M00083 Fatty acid biosynthesis, elongation (5) (complete 1/1)
	M00086 beta-Oxidation, acyl-CoA synthesis (1) (complete 1/1)
	M00087 beta-Oxidation (5) (complete 3/3)
	Lipid metabolism
	M00093 Phosphatidylethanolamine (PE) biosynthesis, PA => PS => PE (3) (complete 3/3)
	Nucleotide metabolism
	Purine metabolism
	M00048 De novo purine biosynthesis, PRPP + glutamine => IMP (11) (complete 8/8)
	M00049 Adenine ribonucleotide biosynthesis, IMP => ADP,ATP (4) (complete 4/4)
	M00050 Guanine ribonucleotide biosynthesis, IMP => GDP,GTP (4) (complete 4/4)
	M00053 Deoxyribonucleotide biosynthesis, ADP/GDP/CDP/UDP => dATP/dGTP/dCTP/dUTP (3) (complete 2/2)
	M00958 Adenine ribonucleotide degradation, AMP => Urate (6) (complete 3/3)
	Pyrimidine metabolism
	M00052 Pyrimidine ribonucleotide biosynthesis, UMP => UDP/UTP,CDP/CTP (3) (complete 3/3)
	M00938 Pyrimidine deoxyribonucleotide biosynthesis, UDP => dTTP (6) (complete 5/5)
	Amino acid metabolism
	Serine and threonine metabolism
	M00018 Threonine biosynthesis, aspartate => homoserine => threonine (5) (complete 5/5)
	Cysteine and methionine metabolism
	M00338 Cysteine biosynthesis, homocysteine + serine => cysteine (2) (complete 2/2)
	M00034 Methionine salvage pathway (10) (complete 8/8)
	Branched-chain amino acid metabolism
	M00019 Valine/isoleucine biosynthesis, pyruvate => valine / 2-oxobutanoate => isoleucine (5) (complete 4/4)
	M00570 Isoleucine biosynthesis, threonine => 2-oxobutanoate => isoleucine (6) (complete 5/5)
	M00036 Leucine degradation, leucine => acetoacetate + acetyl-CoA (12) (complete 6/6)
	Lysine metabolism
	M00016 Lysine biosynthesis, succinyl-DAP pathway, aspartate => lysine (9) (complete 9/9)
	Arginine and proline metabolism
	M00028 Ornithine biosynthesis, glutamate => ornithine (4) (complete 4/4)
	M00845 Arginine biosynthesis, glutamate => acetylcitrulline => arginine (7) (complete 7/7)
	M00015 Proline biosynthesis, glutamate => proline (3) (complete 2/2)
	Histidine metabolism
	M00026 Histidine biosynthesis, PRPP => histidine (10) (complete 6/6)
	M00045 Histidine degradation, histidine => N-formiminoglutamate => glutamate (5) (complete 4/4)
	Aromatic amino acid metabolism
	M00022 Shikimate pathway, phosphoenolpyruvate + erythrose-4P => chorismate (7) (complete 4/4)
	M00023 Tryptophan biosynthesis, chorismate => tryptophan (7) (complete 3/3)
	M00024 Phenylalanine biosynthesis, chorismate => phenylpyruvate => phenylalanine (2) (complete 2/2)
	Other amino acid metabolism
	M00118 Glutathione biosynthesis, glutamate => glutathione (2) (complete 2/2)
	Glycan metabolism
	Lipopolysaccharide metabolism
	M00063 CMP-KDO biosynthesis (4) (complete 4/4)
	Metabolism of cofactors and vitamins
	Cofactor and vitamin metabolism
	M00125 Riboflavin biosynthesis, plants and bacteria, GTP => riboflavin/FMN/FAD (6) (complete 7/7)
	M00119 Pantothenate biosynthesis, valine/L-aspartate => pantothenate (5) (complete 5/5)
	M00120 Coenzyme A biosynthesis, pantothenate => CoA (4) (complete 3/3)
	M00123 Biotin biosynthesis, pimeloyl-ACP/CoA => biotin (4) (complete 3/3)
	M00881 Lipoic acid biosynthesis, plants and bacteria, octanoyl-ACP => dihydrolipoyl-E2/H (2) (complete 2/2)
	M00121 Heme biosynthesis, plants and bacteria, glutamate => heme (11) (complete 10/10)
	M00122 Cobalamin biosynthesis, cobyrinate a,c-diamide => cobalamin (9) (complete 7/7)
	Biosynthesis of terpenoids and polyketides
	Polyketide sugar unit biosynthesis
	M00793 dTDP-L-rhamnose biosynthesis (4) (complete 3/3)

## Sheet: S2 Table
S2 Table: Resfams prediction of Luteibacter flocculans EIF3T.
Gene ID	Resfams Family Name	Description	Mechanism Classification	Gene symbol	Resfams ID
PRJNA669578|IM816_003130	RND_Antibiotic_Efflux	resistance-nodulation-cell_division_(RND)_antibiotic_efflux_pump	RND_Antibiotic_Efflux	RND_efflux	RF0115
PRJNA669578|IM816_001248	RND_Antibiotic_Efflux	resistance-nodulation-cell_division_(RND)_antibiotic_efflux_pump	RND_Antibiotic_Efflux	RND_efflux	RF0115
PRJNA669578|IM816_001221	Antibiotic_Inactivation	tetX:_tetracycline_inactivation_enzyme	Tetracycline_Inactivation	tet_MFS_efflux	RF0136
PRJNA669578|IM816_002533	ABC_Transporter	PF00005.22_ABC_transporter	Undetermined	ABC_efflux	RF0008
PRJNA669578|IM816_003129	RND_Antibiotic_Efflux	mexE:_membrane_fusion_protein_of_the_MexEF-OprN_multidrug_efflux_complex	RND_Antibiotic_Efflux	MexE	RF0098
PRJNA669578|IM816_002307	ABC_Transporter	PF00005.22_ABC_transporter	Undetermined	ABC_efflux	RF0008
PRJNA669578|IM816_002340	Beta-Lactamase	Class_A_beta-lactamase	Beta-Lactamase	ClassA	RF0053
PRJNA669578|IM816_001460	ABC_Transporter	PF00005.22_ABC_transporter	Undetermined	ABC_efflux	RF0008
PRJNA669578|IM816_003460	Antibiotic_Inactivation	tetX:_tetracycline_inactivation_enzyme	Tetracycline_Inactivation	tet_MFS_efflux	RF0136
PRJNA669578|IM816_001247	RND_Antibiotic_Efflux	mexH:_membrane_fusion_protein_of_the_efflux_complex_MexGHI-OpmD	RND_Antibiotic_Efflux	MexH	RF0099

## Sheet: S3 Table
S3 Table: List of putative biosynthetic gene clusters in Luteibacter flocculans EIF3T
	Region	Type	Start (bp)	End (bp)	Most similar known cluster (% of genes showing similarity)
	Region 1	RiPP-like	307.637	316.249
	Region 2	transAT-PKS, PKS-like, T3PKS, NRPS	1,414,589	1,537,480	calyculin A / phosphocalyculin A / calyculinamide A / dephosphonocalyculin A
	Region 3	NRPS, T1PKS	1,919,527	1,972,527	capsular polysaccharide
	Region 4	lanthipeptide-class-ii	2,131,579	2,154,464
	Region 5	arylpolyene	2,844,888	2,892,710	APE Ec
	Region 6	RiPP-like	3,770,446	3,783,738
	Region 7	arylpolyene	3,996,870	4,038,060	xanthomonadin
	Region 8	lanthipeptide-class-iii	4,182,201	4,204,864

## Sheet: S4 Table
S4 Table: Pairwise comparisons of EIF3 against type strain genomes from TYGS (Meier-Kolthoff and Göker, 2019).
Meier-Kolthoff JP, Göker M. TYGS is an automated high-throughput platform for state-of-the-art genome-based taxonomy. Nat Commun. 2019;10:2182.
Query strain	Subject strain	dDDH (d0, in %)	C.I. (d0, in %)	dDDH (d4, in %)	C.I. (d4, in %)	dDDH (d6, in %)	C.I. (d6, in %)	G+C content difference (in %)
EIF3'	Luteibacter yeojuensis DSM 17673	37.1	[33.7 - 40.6]	25.5	[23.2 - 28.0]	33.2	[30.2 - 36.3]	1.72
'EIF3'	Luteibacter jiangsuensis CGMCC 1.10133	39.3	[35.9 - 42.7]	24.8	[22.5 - 27.3]	34.5	[31.5 - 37.5]	1.14
'EIF3'	Luteibacter anthropi CCUG 25036	25	[21.7 - 28.7]	23.4	[21.1 - 25.9]	23.6	[20.8 - 26.7]	0.63
'EIF3'	Luteibacter rhizovicinus DSM 16549	27.6	[24.2 - 31.2]	23.3	[21.0 - 25.7]	25.6	[22.7 - 28.7]	0.29
'EIF3'	Luteibacter pinisoli KACC 19298T	31.8	[28.4 - 35.4]	22.5	[20.3 - 25.0]	28.5	[25.6 - 31.6]	1.32
'EIF3'	Fulvimonas soli DSM 14263	17	[14.0 - 20.5]	20.4	[18.1 - 22.8]	16.8	[14.2 - 19.8]	6.88
'EIF3'	Frateuria flava MAH- 13T	16.1	[13.1 - 19.5]	20.3	[18.0 - 22.7]	16	[13.5 - 18.9]	3.24
'EIF3'	Frateuria defendens DHoT	16.5	[13.5 - 20.0]	20.2	[18.0 - 22.6]	16.4	[13.8 - 19.3]	5.09
'EIF3'	Dyella solisilvae DHG54	16.1	[13.1 - 19.6]	20.2	[18.0 - 22.6]	16	[13.5 - 18.9]	0.55
'EIF3'	Dyella thiooxydans KACC 12756	16.2	[13.2 - 19.7]	20	[17.8 - 22.4]	16.1	[13.6 - 19.1]	3.16
'EIF3'	Dyella kyungheensis THG-B117	16.2	[13.2 - 19.7]	20	[17.8 - 22.4]	16.1	[13.6 - 19.0]	0.36
'EIF3'	Dyella terrae KACC 12748	15.7	[12.7 - 19.1]	19.9	[17.7 - 22.3]	15.7	[13.1 - 18.6]	1

## Sheet: S5 Table
S5 Table: Phylogenetic analysis for Luteibacter flocculans EIF3T.
		Luteibacter yeojuensis DSM 17673	Dyella kyungheensis THG-B117	Frateuria defendens DHo	Frateuria flava MAH-13	Luteibacter pinisoli KACC 19298	Frateuria terrea DSM 26515	Luteibacter flocculans EIF3	Dyella solisilvae DHG54	Luteibacter jiangsuensis CGMCC 1.10133	Luteibacter rhizovicinus DSM 16549	Luteibacter anthropi CCUG 25036	Dyella thiooxydans KACC 12756	Fulvimonas soli DSM 14263
	Luteibacter yeojuensis DSM 17673	1.0	0.8411936830328327	0.841155656885678	0.8394136642982583	0.8483955335041031	0.8401672034433977	0.8552115837274263	0.843630787441823	0.8667122451887044	0.8478363235988529	0.8508724340272259	0.8413877569912113	0.8416812560789217
	Dyella kyungheensis THG-B117	0.8411936830328327	1.0	0.8479349939943035	0.8461419912264203	0.840562818935704	0.8443231674446351	0.8405134750889864	0.8590980079352173	0.8400971323380266	0.8394666965436111	0.8402627553759419	0.8481941833140771	0.8501652579573428
	Frateuria defendens DHo	0.841155656885678	0.8479349939943035	1.0	0.8518175989149527	0.8377561647593254	0.8506473137682093	0.8391262027030275	0.8509551884950423	0.8417021454211537	0.8366605164415034	0.8398308257363432	0.853910177119782	0.8706123583064883
	Frateuria flava MAH-13	0.8394136642982583	0.8461419912264203	0.8518175989149527	1.0	0.8385237704248207	0.8753868428533538	0.8396672828096119	0.8483123562830452	0.8411264863549406	0.8381025811284308	0.8392972084354724	0.8532989579421272	0.8581471370814472
	Luteibacter pinisoli KACC 19298	0.8483955335041031	0.840562818935704	0.8377561647593254	0.8385237704248207	1.0	0.8376006599660935	0.844644349532649	0.8413289495505939	0.8464812423758554	0.8452952548431624	0.8508204729586492	0.8392320018971526	0.8370565680564811
	Frateuria terrea DSM 26515	0.8401672034433977	0.8443231674446351	0.8506473137682093	0.8753868428533538	0.8376006599660935	1.0	0.8403199063688677	0.8479692452036481	0.8394986984431588	0.8362204357691939	0.8390322300601685	0.8509447116754875	0.8580322890391269
	Luteibacter flocculans EIF3	0.8552115837274263	0.8405134750889864	0.8391262027030275	0.8396672828096119	0.844644349532649	0.8403199063688677	1.0	0.8420529637920747	0.8541254870375548	0.845973408797336	0.8473128689424793	0.840307612608187	0.839156545561768
	Dyella solisilvae DHG54	0.843630787441823	0.8590980079352173	0.8509551884950423	0.8483123562830452	0.8413289495505939	0.8479692452036481	0.8420529637920747	1.0	0.8434523419855324	0.839733511786626	0.8440437948838695	0.8521616833764041	0.8542700405640332
	Luteibacter jiangsuensis CGMCC 1.10133	0.8667122451887044	0.8400971323380266	0.8417021454211537	0.8411264863549406	0.8464812423758554	0.8394986984431588	0.8541254870375548	0.8434523419855324	1.0	0.8457036654561637	0.8499537635880573	0.8403412180819446	0.8426459143968872
	Luteibacter rhizovicinus DSM 16549	0.8478363235988529	0.8394666965436111	0.8366605164415034	0.8381025811284308	0.8452952548431624	0.8362204357691939	0.845973408797336	0.839733511786626	0.8457036654561637	1.0	0.8457742076116156	0.8375163848627444	0.8379634675547483
	Luteibacter anthropi CCUG 25036	0.8508724340272259	0.8402627553759419	0.8398308257363432	0.8392972084354724	0.8508204729586492	0.8390322300601685	0.8473128689424793	0.8440437948838695	0.8499537635880573	0.8457742076116156	1.0	0.839645767193167	0.8392894059723994
	Dyella thiooxydans KACC 12756	0.8413877569912113	0.8481941833140771	0.853910177119782	0.8532989579421272	0.8392320018971526	0.8509447116754875	0.840307612608187	0.8521616833764041	0.8403412180819446	0.8375163848627444	0.839645767193167	1.0	0.8586675306614022
	Fulvimonas soli DSM 14263	0.8416812560789217	0.8501652579573428	0.8706123583064883	0.8581471370814472	0.8370565680564811	0.8580322890391269	0.839156545561768	0.8542700405640332	0.8426459143968872	0.8379634675547483	0.8392894059723994	0.8586675306614022	1.0

## Sheet: S6 Table
Supplementary Table S6: PHASTER analysis of Luteibacter flocculans EIF3T.
		Phage Region Overview
		Region	Region Length	Completeness	Score	# Total Proteins	Region Position	Most Common Phage	GC %
		1	21.7KB	incomplete	20	13	1300438-1322193 info_outline	PHAGE_Xylell_Xfas53_NC_013599(2)	63.83
		2	45.9Kb	intact	110	46	1306588-1352491 info_outline	PHAGE_Burkho_Bcep176_NC_007497(7)	63.26
		Phage region Blast Hits
		Region 1, total 15 CDS
		# chromosome	CDS Position	BLAST Hit	E-Value
		1	1300438..1300452	attL	0.0
		2	complement(1306705..1307727)	PHAGE_Xylell_Xfas53_NC_013599: integrase; IM816_05630; phage(gi273810420)	6.34e-137
		3	complement(1307729..1307947)	PHAGE_Xylell_Xfas53_NC_013599: gp02; IM816_05635; phage(gi273810421)	6.03e-15
		4	complement(1307937..1308341)	PHAGE_Erwini_vB_EamM_Y3_NC_047880: recombination endonuclease subunit D12; IM816_05640; phage(gi100261)	3.49e-10
		5	complement(1308338..1308988)	PHAGE_Myxoco_Mx8_NC_003085: hypothetical protein; IM816_05645; phage(gi15320584)	9.09e-51
		6	1308987..1309646	hypothetical protein; IM816_05650	0.0
		7	complement(1309649..1309855)	PHAGE_Aeromo_phiO18P_NC_009542: hypothetical protein; IM816_05655; phage(gi148727145)	3.58e-05
		8	complement(1310057..1310848)	hypothetical protein; IM816_05660	0.0
		9	complement(1310845..1311069)	hypothetical protein; IM816_05665	0.0
		10	complement(1311066..1311233)	hypothetical protein; IM816_05670	0.0
		11	complement(1311230..1311418)	hypothetical protein; IM816_05675	0.0
		12	complement(1311421..1311843)	PHAGE_Gordon_Blueberry_NC_030943: hypothetical protein; IM816_05680; phage(gi100064)	1.55e-22
		13	complement(1311846..1312409)	hypothetical protein; IM816_05685	0.0
		14	complement(1312406..1313572)	PHAGE_Salmon_9NA_NC_025443: putative DNA methylase; IM816_05690; phage(gi712914017)	5.58e-85
		15	1322193..1322207	attR	0.0
		Region 2, total 48 CDS
		# chromosome	CDS Position	BLAST Hit	E-Value
		1	1306588..1306644	attL	0.0
		2	complement(1317067..1317795)	PHAGE_Mannhe_vB_MhS_587AP2_NC_028743: CI repressor; IM816_05730; phage(gi970580063)	6.45e-17
		3	1318280..1318735	PHAGE_Burkho_Bcep176_NC_007497: gp14; IM816_05735; phage(gi77864639)	3.88e-26
		4	1318732..1318923	hypothetical protein; IM816_05740	0.0
		5	1319162..1319413	hypothetical protein; IM816_05745	0.0
		6	1319415..1320440	PHAGE_Pseudo_phi297_NC_016762: putative DNA replication protein O; IM816_05750; phage(gi374531278)	1.20e-48
		7	1320437..1321888	PHAGE_Escher_RCS47_NC_042128: hypothetical protein; IM816_05755; phage(gi100087)	2.86e-68
		8	1321885..1322223	hypothetical protein; IM816_05760	0.0
		9	1322220..1322402	hypothetical protein; IM816_05765	0.0
		10	1322480..1322869	hypothetical protein; IM816_05770	0.0
		11	1322866..1323219	PHAGE_Burkho_Bcep22_NC_005262: hypothetical protein; IM816_05775; phage(gi38640330)	9.66e-16
		12	1323216..1323455	hypothetical protein; IM816_05780	0.0
		13	1323469..1324131	PHAGE_Xylell_Xfas53_NC_013599: gp24; IM816_05785; phage(gi273810443)	3.94e-31
		14	1324155..1325285	PHAGE_Salmon_SJ46_NC_031129: hypothetical protein; IM816_05790; phage(gi100058)	6.18e-39
		15	1325460..1325993	PHAGE_Pseudo_phiPSA1_NC_024365: glycoside hydrolase family 19 protein; IM816_05795; phage(gi658307722)	1.59e-55
		16	1325990..1326337	PHAGE_Pantoe_vB_PagS_Vid5_NC_042120: hypothetical protein; IM816_05800; phage(gi100099)	3.35e-17
		17	1326318..1326800	PHAGE_Pseudo_NP1_NC_031058: hypothetical protein; IM816_05805; phage(gi100003)	2.63e-15
		18	1326987..1327298	PHAGE_Entero_YYZ_2008_NC_011356: putative DNAse; IM816_05810; phage(gi209427773)	9.17e-12
		19	1327534..1327932	PHAGE_Burkho_Bcep176_NC_007497: gp80; IM816_05815; phage(gi77864706)	1.49e-05
		20	1327937..1329616	PHAGE_Burkho_Bcep176_NC_007497: gp79; IM816_05820; phage(gi77864705)	0.0
		21	1329613..1330896	PHAGE_Xantho_CP1_NC_019933: putative head portal protein; IM816_05825; phage(gi431811001)	2.36e-134
		22	1330901..1331767	PHAGE_Entero_mEp235_NC_019708: head maturation protease; IM816_05830; phage(gi428781814)	4.44e-93
		23	1331788..1333122	PHAGE_Xantho_CP1_NC_019933: putative head protein; IM816_05835; phage(gi431811003)	1.70e-173
		24	1333168..1333629	hypothetical protein; IM816_05840	0.0
		25	1333631..1333978	PHAGE_Burkho_Bcep176_NC_007497: gp74; IM816_05845; phage(gi77864700)	2.28e-16
		26	1333981..1334337	head-tail adaptor protein; IM816_05850	0.0
		27	1334330..1334716	PHAGE_Burkho_Bcep176_NC_007497: gp72; IM816_05855; phage(gi77864698)	7.52e-10
		28	1334719..1335054	PHAGE_Burkho_Bcep176_NC_007497: gp71; IM816_05860; phage(gi77864697)	8.73e-06
		29	1335136..1335573	hypothetical protein; IM816_05865	0.0
		30	1335573..1335995	PHAGE_Arthro_Laroye_NC_041947: capsid decoration protein; IM816_05870; phage(gi100066)	2.17e-06
		31	1336037..1336204	hypothetical protein; IM816_05875	0.0
		32	1336207..1339827	PHAGE_Pseudo_phiPSA1_NC_024365: tail tape measure protein; IM816_05880; phage(gi658307709)	7.59e-30
		33	1339827..1340207	PHAGE_Pseudo_PAJU2_NC_011373: hypothetical protein; IM816_05885; phage(gi209552438)	9.94e-20
		34	1340207..1340743	PHAGE_Burkho_BcepGomr_NC_009447: BcepGomrgp20; IM816_05890; phage(gi146329932)	2.94e-60
		35	complement(1340710..1341123)	hypothetical protein; IM816_05895	0.0
		36	1341638..1345570	PHAGE_Achrom_JWX_NC_028768: tail component protein; IM816_05900; phage(gi971741702)	0.0
		37	1345570..1345869	PHAGE_Burkho_Bcep176_NC_007497: gp61; IM816_05905; phage(gi77864686)	5.41e-07
		38	1345869..1346510	hypothetical protein; IM816_05910	0.0
		39	1346518..1347012	PHAGE_Pantoe_vB_PagS_Vid5_NC_042120: hypothetical protein; IM816_05915; phage(gi100025)	8.86e-05
		40	1347014..1347457	hypothetical protein; IM816_05920	0.0
		41	1347492..1348193	PHAGE_Erwini_vB_EhrS_59_NC_048198: holin; IM816_05925; phage(gi100034)	1.33e-27
		42	complement(1348296..1348655)	hypothetical protein; IM816_05930	0.0
		43	complement(1348627..1349130)	helix-turn-helix transcriptional regulator; IM816_05935	0.0
		44	complement(1349683..1349964)	hypothetical protein; IM816_05940	0.0
		45	1350065..1350490	hypothetical protein; IM816_05945	0.0
		46	complement(1350487..1350675)	hypothetical protein; IM816_05950	0.0
		47	1351025..1351081	attR	0.0
		48	1351265..1352491	PHAGE_Stenot_S1_NC_011589: putative integrase; IM816_05955; phage(gi213163927)	4.16e-106

## Sheet: S7 Table
S7 Table: Genes and their putative functions of Luteibacter-associated phage vB_LflM-Pluto and its closest relatives.
locus_tag	Product	Function	Closest relative (identity in percentage via blastp)
PLUTO_00010	spike protein	mediates the recognition and adhesion between the bacteriophage and the surface of bacterial cells	Xanthomonas phage FoX6 (53.81%)
PLUTO_00020	hypothetical protein	–	Xanthomonas phage FoX6 (45.93%)
PLUTO_00030	hypothetical protein	–	Xanthomonas phage Carpasina (60.54%)
PLUTO_00040	transglycosylase	could facilitate infection of host cells with high cell density	Xanthomonas phage FoX6 (42.12%)
PLUTO_00050	hypothetical protein	–	Xanthomonas phage Carpasina (61.29%)
PLUTO_00060	hypothetical protein	–	Xanthomonas phage XcP1 (51.71%)
PLUTO_00070	hypothetical protein	–	Burkholderia phage BCSR52 (45.81%)
PLUTO_00080	hypothetical protein	–	Burkholderia phage BcepF1 (56.36%)
PLUTO_00090	hypothetical protein	–	–
PLUTO_00100	hypothetical protein	–	Burkholderia phage BCSR52 (54.81%)
PLUTO_00110	hypothetical protein	–	Xanthomonas phage Carpasina (53.77%)
PLUTO_00120	hypothetical protein	–	Serratia phage MyoSmar (59.44%)
PLUTO_00130	hypothetical protein	–	Xanthomonas phage Carpasina (61.57%)
PLUTO_00140	hypothetical protein	–	Burkholderia phage BcepF1 (61.63%)
PLUTO_00150	hypothetical protein	–	Serratia phage MTx (44.44%)
PLUTO_00160	hypothetical protein	–	Xanthomonas phage XcP1 (54.76%)
PLUTO_00170	hypothetical protein	–	Xanthomonas phage Carpasina (59.46%)
PLUTO_00180	hypothetical protein	–	Xanthomonas phage FoX6 (64.49%)
PLUTO_00190	major capsid protein	protect viral genomes during entry and exit from the host cells	Xanthomonas phage Carpasina (71.32%)
PLUTO_00200	hypothetical protein	–	–
PLUTO_00210	hypothetical protein	–	Xanthomonas phage Carpasina (58.92%)
PLUTO_00220	head morphogenesis protein	might act in tail completion and stable head joining	Xanthomonas phage XcP1 (56.83%)
PLUTO_00230	inorganic pyrophosphatase	catalyze the hydrolysis of pyrophosphate (PPi) into two orthophosphates (Pi)	Xanthomonas phage Carpasina (53.45%)
PLUTO_00240	hypothetical protein	–	Xanthomonas phage XcP1 (52.08%)
PLUTO_00250	terminase large subunit	involved in the initiation of phage DNA packaging into the prohead	Xanthomonas phage XcP1 (68.80%)
PLUTO_00260	hypothetical protein	–	Escherichia phage EC150 (42.27%)
PLUTO_00270	hypothetical protein	–	–
PLUTO_00280	hypothetical protein	–	–
PLUTO_00290	NTP pyrophosphohydrolase	potential regulator of programmed cell death	Xanthomonas phage Mallos (43.33%)
PLUTO_00300	hypothetical protein	–	–
PLUTO_00310	hypothetical protein	–	–
PLUTO_00320	hypothetical protein	–	uncultured Caudovirales phage (48.70%)
PLUTO_00330	hypothetical protein	–	–
PLUTO_00340	hypothetical protein	–	–
PLUTO_00350	hypothetical protein	–	–
PLUTO_00360	hypothetical protein	–	–
PLUTO_00370	hypothetical protein	–	–
PLUTO_00380	hypothetical protein	–	–
PLUTO_00390	hypothetical protein	–	–
PLUTO_00400	hypothetical protein	–	Pseudomonas phage Kopi (42.37%)
PLUTO_00410	hypothetical protein	–	Burkholderia phage BcepIL02 (40.61%)
PLUTO_00420	hypothetical protein	–	–
PLUTO_00430	hypothetical protein	–	–
PLUTO_00440	histidine kinase	involved in signal transduction pathways upstream of many cellular processes (various metabolic, virulence, and homeostatic pathways)	uncultured Caudovirales phage (46.69%)
PLUTO_00450	hypothetical protein	–	–
PLUTO_00460	hypothetical protein	–	–
PLUTO_00470	hypothetical protein	–	–
PLUTO_00480	hypothetical protein	–	–
PLUTO_00490	hypothetical protein	–	–
PLUTO_00500	hypothetical protein	–	–
PLUTO_00510	hypothetical protein	–	–
PLUTO_00520	hypothetical protein	–	Xanthomonas phage Carpasina (46.36%)
PLUTO_00530	hypothetical protein	–	–
PLUTO_00540	hypothetical protein	–	–
PLUTO_00550	hypothetical protein	–	–
PLUTO_00560	hypothetical protein	–	–
PLUTO_00570	hypothetical protein	–	–
PLUTO_00580	hypothetical protein	–	–
PLUTO_00590	hypothetical protein	–	Burkholderia phage B612_go45 (44.19%)
PLUTO_00600	hypothetical protein	–	–
PLUTO_00610	hypothetical protein	–	Burkholderia phage BcepF1 (46.59%)
PLUTO_00620	hypothetical protein	–	Xanthomonas phage FoX6 (69.79%)
PLUTO_00630	antitoxin protein	Part of the toxin/antitoxin (TA) system in prokaryotes; counteracts a toxin	Rhodococcus phage E3 (48.91%)
PLUTO_00640	hypothetical protein	–	–
PLUTO_00650	hypothetical protein	–	–
PLUTO_00660	hypothetical protein	–	–
PLUTO_00670	hypothetical protein	–	–
PLUTO_00680	hypothetical protein	–	–
PLUTO_00690	hypothetical protein	–	–
PLUTO_00700	hypothetical protein	–	–
PLUTO_00710	hypothetical protein	–	–
PLUTO_00720	hypothetical protein	–	–
PLUTO_00730	hypothetical protein	–	–
PLUTO_00740	hypothetical protein	–	–
PLUTO_00750	hypothetical protein	–	–
PLUTO_00760	ATP-dependent DNA helicase	involved in genome maintenance by unwindind paired DNA	Xanthomonas phage XcP1 (64.45%)
PLUTO_00770	hypothetical protein	–	Xanthomonas phage FoX6 (47.93%)
PLUTO_00780	hypothetical protein	–	Xanthomonas phage Carpasina (55.59%)
PLUTO_00790	thymidylate synthase	plays a crucial role in the early stages of DNA biosynthesis	Panteoa phage Kyle (63.41%)
PLUTO_00800	polynucleotide kinase	serves immune evasion during infection of bacteria by counter-reacting T4-induced anticodonuclease	Xanthomonas phage Carpasina (45.09%)
PLUTO_00810	short-chain dehydrogenase/reductase	multifunctional enzyme	Xanthomonas phage XcP1 (68.58%)
PLUTO_00820	hypothetical protein	–	Xanthomonas phage Carpasina (66.47%)
PLUTO_00830	three-prime repair exonuclease I	may serve a proofreading function for DNA polymerase	Xanthomonas phage FoX6 (56.04%)
PLUTO_00840	DNA polymerase III subunit alpha	responsible for most of the replicative synthesis in bacteria	Xanthomonas phage FoX6 (74.52%)
PLUTO_00850	hypothetical protein	–	–
PLUTO_00860	putative nuclease	able to cleave the phosphodiester bonds between nucleotides of nucleic acids	Xanthomonas phage XcP1 (56.36%)
PLUTO_00870	helicase	involved in genome maintenance by unwindind paired DNA	Xanthomonas phage XcP1 (70.75%)
PLUTO_00880	hypothetical protein	–	Xanthomonas phage XcP1 (45.05%)
PLUTO_00890	hypothetical protein	–	Xanthomonas phage FoX6 (53.19%)
PLUTO_00900	hypothetical protein	–	Xanthomonas phage Carpasina (59.79%)
PLUTO_00910	hypothetical protein	–	–
PLUTO_00920	hypothetical protein	–	Xanthomonas phage XcP1 (43.62%)
PLUTO_00930	DNA ligase	facilitates the joining of DNA strands by catalyzing the formation of a phosphodiester bond	Xanthomonas phage FoX6 (57.59%)
PLUTO_00940	hypothetical protein	–	–
PLUTO_00950	lysozyme	hydrolyzes glycosidic bonds in peptidoglycans	Serratia phage MTx (51.89%)
PLUTO_00960	hypothetical protein	–	–
PLUTO_00970	hypothetical protein	–	Xanthomonas phage XcP1 (56.50%)
PLUTO_00980	hypothetical protein	–	Xanthomonas phage FoX6 (56.03%)
PLUTO_00990	baseplate protein J	most distal part of the tail of Myo- and Sipho-morphotype bacterial viruses	Xanthomonas phage XcP1 (57.78%)
